# Supplementary material for: Feasibility of a Compulsory Online Compassion Training Module in Final Year Medical Student Curriculum
Source: Research Square preprint supplement (doi:10.21203/rs.3.rs-6781229/v1), 2025-07-28
Supplement: Supplementary file 1 [file b640acac54aa3314097bb782.docx]

**Appendix**

**Appendix 1: Frequency analysis of Likert scale survey responses**

| **Questions** | Response | Frequency | Valid Percent |
| --- | --- | --- | --- |
| 1. **General Evaluation** |  |  |  |
| 1. The course has improved my understanding of compassion, avoiding empathic distress, managing when compassion is challenging and sustaining compassion in my daily work. | Strongly Disagree | 2 | 0.7 |
| Disagree | 13 | 4.2 |
| Neutral | 24 | 7.8 |
| Agree | **153** | **50.0** |
| Strongly Agree | 114 | 37.3 |
| Total | 306 | 100.0 |
| 1. The online resources and activities have improved my skills and knowledge to maintain best practice. | Strongly Disagree | 2 | 0.7 |
| Disagree | 17 | 5.6 |
| Neutral | 50 | 16.3 |
| Agree | **156** | **51.0** |
| Strongly Agree | 81 | 26.5 |
| Total | 306 | 100.0 |
| 1. The teaching staff and presenters were enthusiastic, knowledgeable, and provided me with useful advice. | Disagree | 3 | 1.0 |
| Neutral | 33 | 10.8 |
| Agree | 127 | 41.5 |
| Strongly Agree | **143** | **46.7** |
| Total | 306 | 100.0 |
| 1. The online program was well organized and well-administered. | Strongly Disagree | 10 | 3.3 |
| Disagree | 20 | 6.5 |
| Neutral | 57 | 18.6 |
| Agree | **126** | **41.2** |
| Strongly Agree | 93 | 30.4 |
| Total | 306 | 100.0 |
| **Individual Module Evaluation** | | | |
| 1. Week 1: Introducing compassion | Not at all useful | 3 | 1.0 |
| Slightly useful | 19 | 6.2 |
| Moderately useful | 82 | 26.8 |
| Very useful | **109** | **35.6** |
| Extremely useful | 93 | 30.4 |
| Total | 306 | 100.0 |
| 1. Week 2: Barriers to compassion | Not at all useful | 2 | 0.7 |
| Slightly useful | 20 | 6.5 |
| Moderately useful | 68 | 22.2 |
| Very useful | **129** | **42.2** |
| Extremely useful | 87 | 28.4 |
| Total | 306 | 100.0 |
| 1. Week 3: Common humanity | Not at all useful | 2 | 0.7 |
| Slightly useful | 22 | 7.2 |
| Moderately useful | 81 | 26.5 |
| Very useful | **125** | **40.8** |
| Extremely useful | 76 | 24.8 |
| Total | 306 | 100.0 |
| 1. Week 4: Sustaining compassion | Not at all useful | 3 | 1.0 |
| Slightly useful | 23 | 7.5 |
| Moderately useful | 83 | 27.1 |
| Very useful | **121** | **39.5** |
| Extremely useful | 76 | 24.8 |
| Total | 306 | 100.0 |
| 1. Week 4: Live event (online workshop) | Not at all useful | 9 | 2.9 |
| Slightly useful | 36 | 11.8 |
| Moderately useful | **119** | **38.9** |
| Very useful | 97 | 31.7 |
| Extremely useful | 45 | 14.7 |
| Total | 306 | 100.0 |
| 1. The amount of information and content provided was: | Not enough | 7 | 2.3 |
| Just right | **229** | **74.8** |
| Too much | 70 | 22.9 |
| Total | 306 | 100.0 |

**Appendix 2: Representative quotes from the qualitative analysis with the Likert scale rating total score**

| Candidate No. | Total Evaluation Score | Exemplar Quote |
| --- | --- | --- |
| Theme 1: Compassion Literacy | | |
| 191 | 43/45 | “This course greatly increased my understanding of compassion” |
| 261 | 33/45 | “The difference between compassion and empathy and the concept of empathic distress” |
| 22 | 40/45 | “I enjoyed how compassion was broken down and explored with evidence” |
| 234 | 32/45 | “Most valuable was the distinction between compassion and empathy” |
| 195 | 44/45 | “Perhaps more in-depth discussion surrounding self-compassion” |
| Theme 2: Shift in Attitudes | | |
| 41 | 42/45 | “I learnt that compassion is important, and as much as it is easy to miss out on compassion to patients, we have the responsibility to provide compassion to our patients as that could significantly improve patient care.” |
| 291 | 32/45 | “It has reignited some of my passion of becoming a future doctor which I have, regrettably slightly lost my way throughout these 5 years of medical school. It reminded me of my true and original goal of being able to help people in a caring and personal way” |
| 341 | 27/45 | “I also think the content and the importance of compassion training is extremely crucial to our training.” |
| Theme 3: Strategies | | |
| 154 | 41/45 | “Practical strategies to avoid empathic distress and reduce risk of burnout. Skills to identify warning signs and strategies in self-care” |
| 52 | 32/45 | “Compassion and how to put it into practice and avoid common pitfalls that may make us less effectively compassionate or even cause emotional distress” |
| 330 | 34/45 | “I have found my-self suffering from empathy distress without being able to realize what this is so it’s truly helped to be able to identify this and understand how I can shift” |
| 30 | 23/45 | “More concrete strategies on reducing burnout/compassion fatigue in the longer-term” |
| 189 | 42/45 | “How it encouraged me to reflect on my own experiences” |
| Theme 4: Delivery | | |
| 124 | 42/45 | “I liked the different learning styles with watching, reading and although provoking exercises we could do” |
| 59 | 38/45 | “Personally, watching the talks by various experts who provide real-life scenarios of application of compassion was the most enjoyable and helpful.” |
|  |  | Subtheme: Forums |
| 61 | 35/45 | “Forums provide interaction between students and reading other people’s responses help me understand the module better” |
| 319 | 45/45 | “I love seeing my colleague’s response every week, especially when we are physically apart - truly makes me feel connected!” |
| 237 | 25/45 | “I found that I struggled to engage with the online forums” |
| 152 | 32/45 | “To reduce the amount of discussion forums.” |
|  |  | Subtheme: Face-to-Face vs Online asynchronous |
| 125 | 29/45 | “I’d love to have a face-to-face day where we discuss compassion. Online modules and forums can be useful, but for something so discussion-based and human as talking about compassion, I find the online format tricky to engage with” |
| 251 | 29/45 | “Workshop would be better, as these skills are better taught in person than online” |
| 329 | 39/45 | “It was very helpful that the course was flexible, and that I could complete it in my own time” |

**Appendix 3:** **Representative quotes from outliers with negative ratings of the course**

| Candidate No. | Total Evaluation Score | Exemplar Quote |
| --- | --- | --- |
| 208 | 18/45 | “The layout of the Moodle* pages and the course links were very confusing to follow. It is also extremely hard to work out what the required tasks are.” |
| 418 | 19/45 | “More close interaction with the teaching staff, I feel like I didn’t interact with any staff or have my responses acknowledged” |
| 441 | 12/45 | “The content was already too much, disorganized, overly complicated, and unnecessary.” |
| 468 | 14/45 | “Less reading/activities” |

(*Moodle is the online platform used)
